# Supplementary material for: The Promise of AI for DILI Prediction
Source: Front Artif Intell. 2021 Apr 14;4:638410. doi: 10.3389/frai.2021.638410 (PMC8080874; doi:10.3389/frai.2021.638410)
Supplement: Supplementary file 1 [file table1.xlsx]

## Sheet: Reviewed studies
Study	Topic	DILI annotations	Data modalities	Predictive models
Ai et al. (2018)	ML	Training dataset derived from Liew et al. (2011) and Zhu and Kruhlak (2014). LTKB dataset (Chen et al., 2011) as validation set.	PaDEL-Descriptor v2.21 molecular descriptors.	Random forests; Support vector machines; XGBoost.
Björnsson and Hoofnagle (2016)	Dataset	Derived from the LiverTox website (Hoofnagle et al., 2013).
Chalasani et al. (2015)	Dataset	Collected in the US as part of the efforts of the drug-induced liver injury network (DILIN). Includes causality assessments.
Chen et al. (2011)	Dataset	Derived from FDA-approved drug labels.
Chen et al. (2013a)	ML	LTKB dataset (Chen et al., 2011) and dataset published by Greene et al. (2010).	Daily dose and lipophilicity provided by Pipeline Pilot 8.0.	Rules.
Chen et al. (2013b)	ML	Training dataset is an extension of the LTKB dataset (Chen et al., 2011). Test on the datasets published by Greene et al. (2010) and Xu et al. (2008).	Mold2 molecular descriptors.	Decision forests (Tong et al., 2003).
Chen et al. (2014)	ML review
Chen et al. (2016)	Dataset	Extension of Chen et al. (2011) with additional drugs and a subsequent verification step. Verification relying on Suzuki et al. (2010), Hoofnagle et al. (2013) and Chalasani et al. (2015).
Chierici et al. (2020)	ML	Binary labels provided by the CMap Drug Safety Challenge 2018.	Gene expression data provided by the CMap Drug Safety Challenge 2018.	Random forests; Shallow neural networks; Deep neural networks.
Clevert et al. (2012)	ML	LTKB dataset (Chen et al., 2011).	Gene expression data from the Japanese Toxicogenomics Project.	Support vector machines.
Cruz-Monteagudo et al. (2008)	ML	Custom selection of positives previously reported by Li (2002) and negatives selected from a drug compendium.	RDF and other molecular descriptors computed with Dragon.	Linear discriminant analysis; Neural networks; One-rule classifiers.
Ekins et al. (2010)	ML	Extension of Xu et al. (2008).	Extended connectivity fingerprints.	Naive Bayes classifiers.
Feng et al. (2019)	ML	In vivo assays on rats.	Gene expression data corresponding to diverse hepatotoxicity categories.	Support vector machines; Shallow neural networks.
Garside et al. (2014)	In vitro	Derived from drug labels and literature.	Measurements from high content fluorescence microscopy.	Rules; Hierarchical cluster analysis.
Greene et al. (2010)	Dataset; ML	Own training dataset derived from literature. Test dataset overlapping with Xu et al. (2008).	Chemical structures exported as an SD file.	Structural alerts.
He et al. (2019)	Dataset; ML	Training on a dataset comprising the LTKB (Chen et al., 2011), Livertox (Björnsson and Hoofnagle, 2016), and DILIrank (Chen et al., 2016) datasets, extended with additional compounds. Test on a dataset comprising the datasets used by Ai et al. (2018), Zhang et al. (2016), Kotsampasakou et al. (2017).	Marvin molecular descriptors.	Ensemble of classifiers, including naive Bayes, k-nearest neighbors, random forest, and an off-the-shelf deep learning solution.
Hong et al. (2017)	ML	Subset of the DILIrank dataset (Chen et al., 2016).	Mold2 molecular descriptors.	Decision forests (Tong et al., 2003).
Hoofnagle and Björnsson (2019)	Review
Huang et al. (2010)	ML	In vivo assays on rats.	Genomic indicators from the blood.	Random forests; Support vector machines; k-nearest neighbors; Nearest centroid.
Kaplowitz (2004)	Review
Khadka et al. (2019)	ML; AOP	DILIrank dataset (Chen et al., 2016).	AOP-supported selection and integration of various high throughput predictors.	Logistic regression.
Kohonen et al. (2017)	ML	Derived from the NCI-60 DTP human tumour cell line (Shoemaker, 2006).	Gene expression data from the CMap dataset (Lamb et al., 2006).	Ad hoc probabilistic model.
Lamb et al. (2006)	Dataset		Gene expression data.
Li et al. (2020a)	ML	DILIst dataset (Thakkar et al., 2020).	Drug-induced transcriptome profiles curated from the NIH LINCS L1000 dataset (Subramanian et al., 2017).	Deep neural networks.
Li et al. (2020b)	ML	DILIst dataset (Thakkar et al., 2020).	Mold2 molecular descriptors.	Deep neural network ensembling classifiers, including logistic regression, k-nearest neighbors, support vector machine, random forest, and XGBoost.
Liew et al. (2011)	Dataset; ML	Drugs collected from the FDA Orange Book. Annotations derived from drug compendia and literature.	PaDEL-Descriptor v2.0 molecular descriptors.	Ensemble of many instances of k-nearest neighbors, support vector machines, and naive Bayes classifiers.
Liu et al. (2011)	ML	LTKB dataset (Chen et al., 2011) and datasets published by Greene et al. (2010) and O'Brien et al. (2006).	Functional class fingerprints (FCFP_6) provided by Pipeline Pilot 8.0.	Naive Bayes classifiers.
Minerali et al. (2020)	ML	DILIrank (Chen et al., 2016), BDDCS (Benet et al., 2011) and “Withdrawn” datasets (Siramshetty et al., 2016), and also from literature (Hong et al., 2017; Aleo et al., 2020; Williams et al., 2020).	Extended-connectivity fingerprints (ECFP_6).	Random forests; k-nearest neighbors; Support vector machines; Naive Bayes classifiers; AdaBoosted decision trees; Deep learning.
Proctor et al. (2017)	In vitro	Derived from drug labels and literature following the classification proposed by Garside et al. (2014).	3D human liver microtissues; Plated 2D primary human hepatocytes.	Rules based on thresholds optimizing the ROC curve.
Przybylak and Cronin (2012)	ML review
Puri (2020)	ML	Japanese Toxicogenomics Project.	Histopathology whole slide images.	Standard computer vision; Computer vision built with automated ML.
Sakatis et al. (2012)	Dataset; ML	Derived from drug labels and reports.	Clinical dose, GSH adduct formation, and P450 MDI.	Decision trees.
Suzuki et al. (2010)	Dataset	From DILI regulatory agencies and literature. Includes frequency of reports.
Thakkar et al. (2020)	Dataset	Derived from the DILIrank dataset (Chen et al., 2016), Björnsson and Hoofnagle (2016), Suzuki et al. (2010), Greene et al. (2010), and Zhu and Kruhlak (2014).
Uehara et al. (2010)	Dataset	In vivo assays on rats.	Genomic biomarkers predictive of the toxicity of chemicals.
Vorrink et al. (2018)	In vitro	Derived from regulatory classifications and literature.	3D spheroid cultures.	Rules.
Wang et al. (2009)	Biological study
Wang et al. (2019)	ML	Subset of the DILIrank dataset (Chen et al., 2016).	PaDEL-Descriptor v2.21 molecular descriptors.	Ensemble of classifiers, including logistic regression, support vector machines, random forests, and multiple gradient boosting decision tree approaches.
Williams et al. (2020)	ML	Derived from the LTKB (Chen et al., 2011) and DILIrank (Chen et al., 2016) datasets, derived from the literature, and in-house annotation as described by Proctor et al. (2017).	Cmax, cLogP, bioactivation, HepG2/C3A spheroid cytotoxicity, mitochondrial toxicity, BSEP inhibition, THP-1 cytotoxicity, cytotoxicity EC50 values.	Bayesian ordered logit model.
Xu et al. (2008)	Dataset; In vitro; ML	Derived from clinical data, drug labels, reports, and preclinical animal toxicology data.	Descriptors derived from human hepatocyte 2D images.	Standard computer vision; Rules; Random forests.
Xu et al. (2015)	ML	Datasets by Xu et al. (2008), Greene et al. (2010), Liew et al. (2011), and Chen et al. (2013b), and a combined dataset integrating the datasets by Xu et al. (2008), Greene et al. (2010), and Chen et al. (2013b).	Molecular structure directly.	Undirected graph recursive neural networks proposed by Lusci et al. (2013).
Zhu and Kruhlak (2014)	Dataset	Dataset derived from FAERS, including frequency of reports. Additional calibration dataset extending Suzuki et al. (2010).		Rules based on setting a threshold that optimizes the calibration ROC curve.
Zhu et al. (2014)	ML	Dataset by Xu et al. (2008).	Molecular descriptors computed with Chemistry Development Kit (v.1.4.13), Dragon (v.5.5), Molecular Operating Environment (v.2009.10), and MayaChemTools; Descriptors derived from human hepatocyte 2D images (Xu et al., 2008); Combination of both.	Random forests.
